# Supplementary material
Source: Springer Nature journal article supplement (https://www.springermedizin.de/resource/supplementary/12889_2012_4906_MOESM1_ESM.pdf/9490668)
Supplement: MOESM1 [file 9490668]

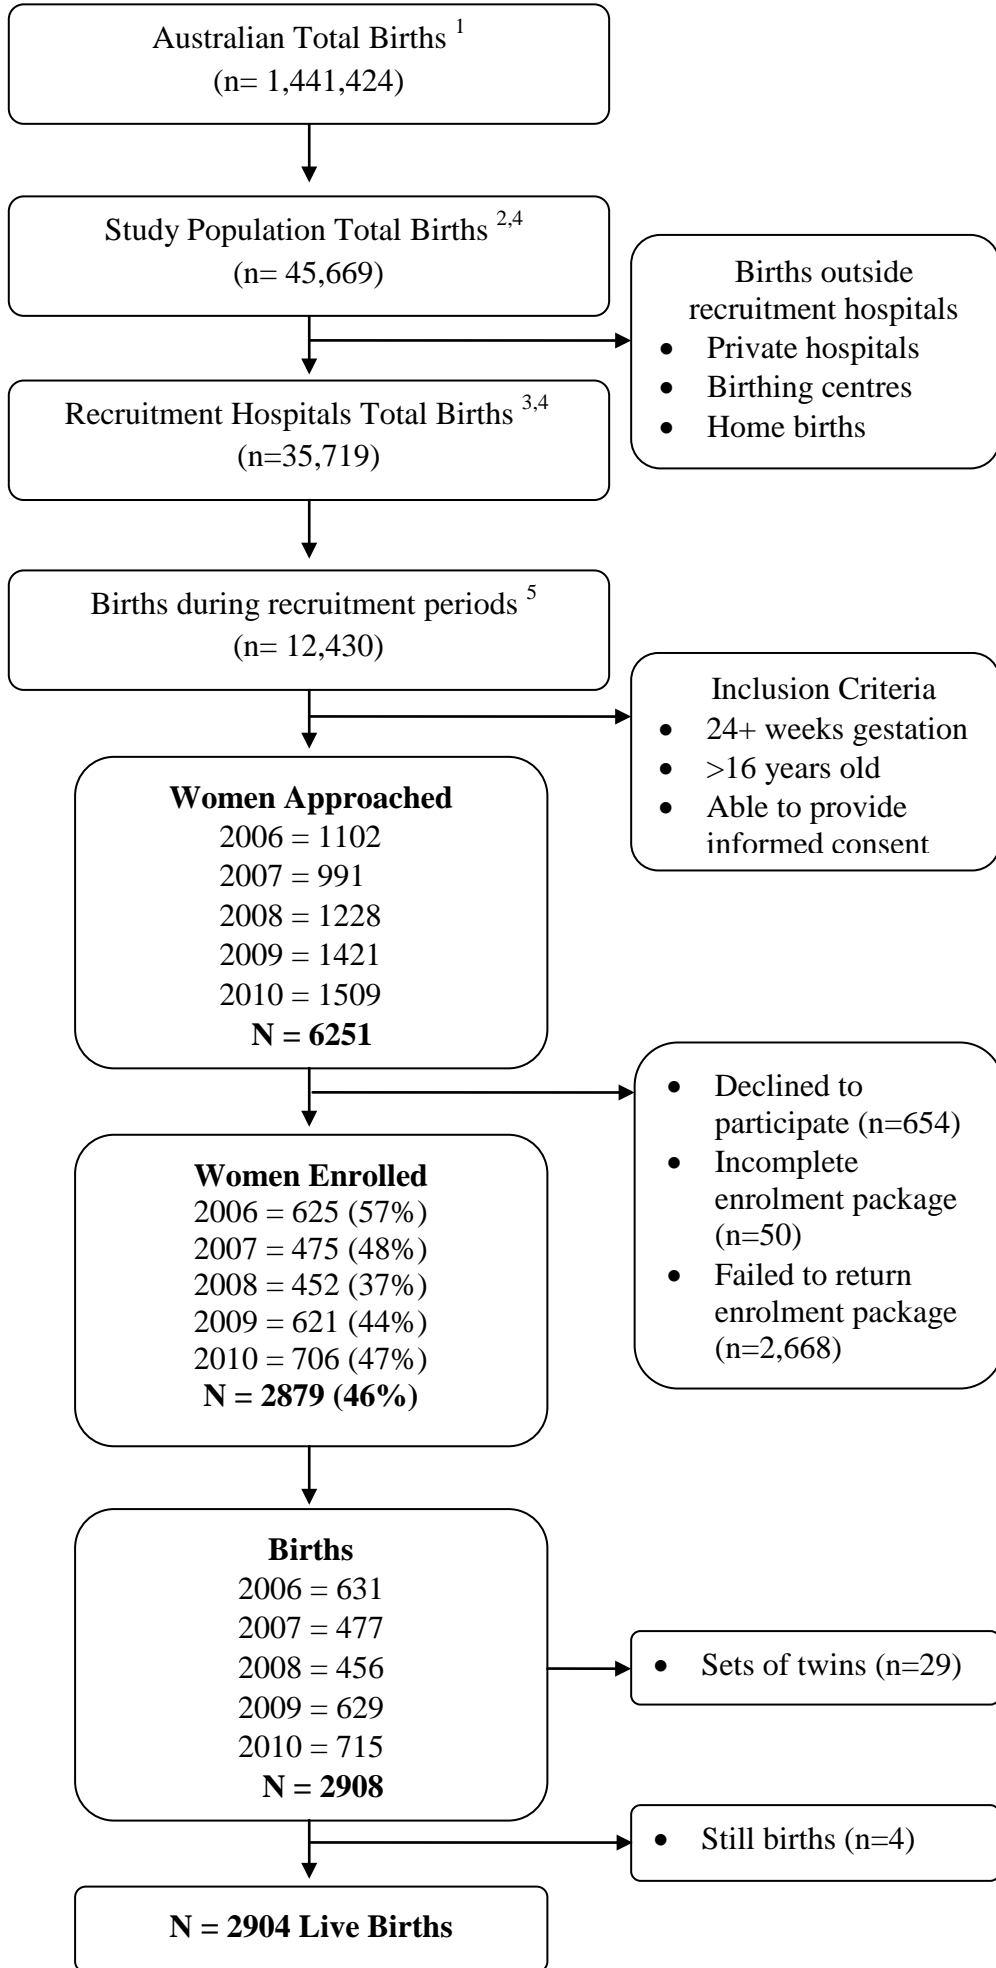

1. Australian Bureau of Statistics 2006-2010
2. Health Districts of Logan, Beaudesert, Gold Coast and Northern Rivers
3. Public Maternity Hospitals - Logan, Gold Coast and The Tweed
4. Queensland Perinatal Statistics 2006-2010; New South Wales Perinatal Statistics 2006-2010
5. The number of births from each annual recruitment period, estimated from Australian Bureau of Statistics proportions 2006-2010
